# Supplementary material for: Reproducibility and Validity of a Self-Administered Food Safety Assessment Tool on Children and Adolescent’s Risk Perception, Knowledge, and Practices
Source: MDPI journal article supplement (doi:10.3390/nu15010213), 2023-01-01
Supplement: s1 [file s1]

School \_\_\_\_\_

Code \_\_\_\_\_ (filled in by the researcher)

Series \_\_\_\_\_ Age: \_\_\_\_\_ years old

Area where you live: ( ) Urban ( ) Rural

Gender: ( ) Female ( ) Male

Date: \_\_\_\_ / \_\_\_\_ / 202\_\_\_\_

**Make an X ONLY A RECTANGLE that matches your answer.**

**ATTENTION:** GETTING SICK = having stomach pain and/or diarrhea and/or vomiting and/or headache and/or fever because you ate contaminated food.

|                                                                                                                                                  |                                                                                                                 |
|--------------------------------------------------------------------------------------------------------------------------------------------------|-----------------------------------------------------------------------------------------------------------------|
| <p>1. What is the chance that YOU will get sick from eating food served at the school you study?</p>                                             | <p>1.1 If YOU get sick from eating food served at the school you study, how serious could it be?</p>            |
| 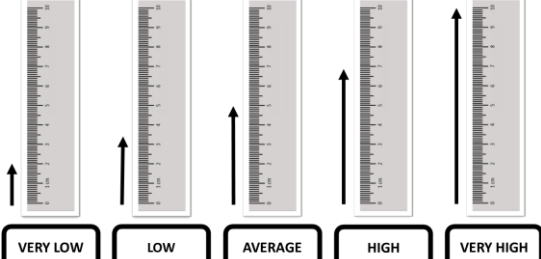                                                                |                               |
| <p>2. What is the chance that a COLLEAGUE who studies with you will get sick from having eaten the same food served at the school you study?</p> | <p>2.1 If YOUR COLLEAGUE get sick from eating food served at the school you study, how serious could it be?</p> |
|                                                               |                             |
| <p>3. What is the chance that a person will die from eating contaminated food?</p>                                                               |                                                                                                                 |
|                                                              |                                                                                                                 |

**Examples of how food can be contaminated:**

- The presence of animal feces in the area where fruits and vegetables are planted;
- The use of pesticides to produce and grow food (fruits, vegetables, cereals such as corn, etc.);
- Due to people's lack of hygiene when preparing food.

Code \_\_\_\_\_ (filled in by the researcher)

**Make an X ONLY A RECTANGLE that matches your answer.**

**ATTENTION:** GETTING SICK = having stomach pain and/or diarrhea and/or vomiting and/or headache and/or fever because you ate contaminated food.

|                                                                                                                                                                                                                                                                                                                                                                                                                                                                                                                                                                                                                                                                                                                                                                                                                                                                                                                                                                                                                                                                                                                                                                                                                                                                         |                                                                                                                                                                                                                                                                                                                                                                                                                                                                                                                                                                                                                                                                                                                                                                                                                                                                                                                                                                                                                                                                                                                                                                                                                                                                                                                                                 |
|-------------------------------------------------------------------------------------------------------------------------------------------------------------------------------------------------------------------------------------------------------------------------------------------------------------------------------------------------------------------------------------------------------------------------------------------------------------------------------------------------------------------------------------------------------------------------------------------------------------------------------------------------------------------------------------------------------------------------------------------------------------------------------------------------------------------------------------------------------------------------------------------------------------------------------------------------------------------------------------------------------------------------------------------------------------------------------------------------------------------------------------------------------------------------------------------------------------------------------------------------------------------------|-------------------------------------------------------------------------------------------------------------------------------------------------------------------------------------------------------------------------------------------------------------------------------------------------------------------------------------------------------------------------------------------------------------------------------------------------------------------------------------------------------------------------------------------------------------------------------------------------------------------------------------------------------------------------------------------------------------------------------------------------------------------------------------------------------------------------------------------------------------------------------------------------------------------------------------------------------------------------------------------------------------------------------------------------------------------------------------------------------------------------------------------------------------------------------------------------------------------------------------------------------------------------------------------------------------------------------------------------|
| <p>1) Do you always need to use soap/soap/detergent to wash your hands correctly?</p> <p><input type="checkbox"/> YES    <input type="checkbox"/> NOT    <input type="checkbox"/> DO NOT KNOW</p> <p>2) Is using a paper towel to clean a dirty board of raw meat enough to be able to use this board to cut bread?</p> <p><b>Enough: when you don't need to do anything else.</b></p> <p><input type="checkbox"/> YES    <input type="checkbox"/> NOT    <input type="checkbox"/> DO NOT KNOW</p> <p>3) Should raw meats be kept in the refrigerator on shelves below ready-to-eat foods?</p> <p><b>Examples of ready-to-eat foods: cake, cooked rice, baked beans.</b></p> <p><input type="checkbox"/> YES    <input type="checkbox"/> NOT    <input type="checkbox"/> DO NOT KNOW</p> <p>4) Eating a raw egg or soft yolk can make you sick?</p> <p><input type="checkbox"/> YES    <input type="checkbox"/> NOT    <input type="checkbox"/> DO NOT KNOW</p> <p>5) Eating food that was out of the fridge for a long time after it was done can make you sick?</p> <p><b>Ex: Food prepared for lunch that stayed until dinner time on the stove.</b></p> <p><input type="checkbox"/> YES    <input type="checkbox"/> NOT    <input type="checkbox"/> DO NOT KNOW</p> | <p>6) Eating foods with a bad smell, bad taste, different texture than usual or moldy, can make you sick?</p> <p><input type="checkbox"/> YES    <input type="checkbox"/> NOT    <input type="checkbox"/> DO NOT KNOW</p> <p>7) Removing the moldy part of bread before eating reduces or eliminates the chance of you becoming ill?</p> <p><input type="checkbox"/> YES    <input type="checkbox"/> NOT    <input type="checkbox"/> DO NOT KNOW</p> <p>8) Eating food made in a kitchen that contains flies and other insects can make you sick?</p> <p><input type="checkbox"/> YES    <input type="checkbox"/> NOT    <input type="checkbox"/> DO NOT KNOW</p> <p>9) To eat raw fruits and vegetables, do you need to wash them using bleach?</p> <p><input type="checkbox"/> YES    <input type="checkbox"/> NOT    <input type="checkbox"/> DO NOT KNOW</p> <p>10) Can eat fruits and vegetables that have been grown with pesticides make you sick?</p> <p><input type="checkbox"/> YES    <input type="checkbox"/> NOT    <input type="checkbox"/> DO NOT KNOW</p> <p>11) Does unsafe food to eat always smell foul, look strange, and have a different texture?</p> <p><b>Unsafe food: food that can make you sick.</b></p> <p><input type="checkbox"/> YES    <input type="checkbox"/> NOT    <input type="checkbox"/> DO NOT KNOW</p> |
|-------------------------------------------------------------------------------------------------------------------------------------------------------------------------------------------------------------------------------------------------------------------------------------------------------------------------------------------------------------------------------------------------------------------------------------------------------------------------------------------------------------------------------------------------------------------------------------------------------------------------------------------------------------------------------------------------------------------------------------------------------------------------------------------------------------------------------------------------------------------------------------------------------------------------------------------------------------------------------------------------------------------------------------------------------------------------------------------------------------------------------------------------------------------------------------------------------------------------------------------------------------------------|-------------------------------------------------------------------------------------------------------------------------------------------------------------------------------------------------------------------------------------------------------------------------------------------------------------------------------------------------------------------------------------------------------------------------------------------------------------------------------------------------------------------------------------------------------------------------------------------------------------------------------------------------------------------------------------------------------------------------------------------------------------------------------------------------------------------------------------------------------------------------------------------------------------------------------------------------------------------------------------------------------------------------------------------------------------------------------------------------------------------------------------------------------------------------------------------------------------------------------------------------------------------------------------------------------------------------------------------------|

Code \_\_\_\_\_ (filled in by the researcher)

**Make an X ONLY A RECTANGLE that matches your answer.**

Never = never did this action

Rarely = does this action from time to time

Sometimes = do this action sometimes

Often = do this action many times

Always = this action is part of your daily life

1) Do you wash your hands with soap and water/soap/ detergent before eating?

NEVER

RARELY

SOMETIMES

OFTEN

ALWAYS

2) When you open a milk carton, do you leave it out of the fridge for more than an hour?

NEVER

RARELY

SOMETIMES

OFTEN

ALWAYS

3) Do you store food in the refrigerator in closed packages or containers with a lid?

NEVER

RARELY

SOMETIMES

OFTEN

ALWAYS

4) Before eating the food, do you look at the expiration date on the packaging?

NEVER

RARELY

SOMETIMES

OFTEN

ALWAYS

5) Do you eat expired foods that have a good smell, normal appearance, and texture?

NEVER

RARELY

SOMETIMES

OFTEN

ALWAYS

6) Do you eat raw or soft yolk eggs?

NEVER

RARELY

SOMETIMES

OFTEN

ALWAYS

7) Do you eat bread after removing a moldy part?

NEVER

RARELY

SOMETIMES

OFTEN

ALWAYS

Code \_\_\_\_\_ (filled in by the researcher)

8) Do you eat fruits without washing them?

**Examples of fruit: apple, grape, orange.**

|       |        |           |       |        |
|-------|--------|-----------|-------|--------|
| NEVER | RARELY | SOMETIMES | OFTEN | ALWAYS |
|-------|--------|-----------|-------|--------|

9) Do you help in preparing food or food at home?

|       |        |           |       |        |
|-------|--------|-----------|-------|--------|
| NEVER | RARELY | SOMETIMES | OFTEN | ALWAYS |
|-------|--------|-----------|-------|--------|

**IF YOU SCORE IN THE PREVIOUS QUESTION, THE OPTIONS RARELY, SOMETIMES, OFTEN OR ALWAYS OR ALWAYS, ANSWER THE NEXT QUESTIONS:**

10) Do you wash your hands with soap and water/soap/detergent before preparing or helping to prepare meals or food?

|       |        |           |       |        |
|-------|--------|-----------|-------|--------|
| NEVER | RARELY | SOMETIMES | OFTEN | ALWAYS |
|-------|--------|-----------|-------|--------|

11) Do you check if the benches or tables you are going to use are clean before preparing meals or food?

|       |        |           |       |        |
|-------|--------|-----------|-------|--------|
| NEVER | RARELY | SOMETIMES | OFTEN | ALWAYS |
|-------|--------|-----------|-------|--------|

12) What did you think of this questionnaire? Would you have any comments to improve it?

---

---

---

Thank you! 

**Figure S1.** The instrument developed by Batista et al. (2021) used in the research.
